# Younger Age at Onset of Type 1 Diabetes in Concordant Sibling Pairs Is Associated With Increased Risk for Autoimmune Thyroid Disease

GREGORY GOODWIN, MD<sup>1</sup>  
LISA K. VOLKENING, BA<sup>2</sup>  
LORI M.B. LAFFEL, MD, MPH<sup>1,2</sup>

Individuals with type 1 diabetes are at increased risk for the development of additional autoimmune disorders compared with the general population (1–11). Autoimmune thyroiditis (AIT) and celiac disease are relatively common among patients with type 1 diabetes, with prevalence rates of ~17 and 6%, respectively (4). We sought to examine the relationship between age at onset of type 1 diabetes and prevalence of additional autoimmune disorders in a sample of sibling pairs concordant for type 1 diabetes.

## RESEARCH DESIGN AND METHODS

— Sibling pairs concordant for type 1 diabetes who visited the Joslin Diabetes Center's Pediatric, Adolescent, and Young Adult Section between June 2002 and March 2005 were identified via a search of the electronic patient database. All identified patients were insulin dependent since diagnosis and showed no evidence of insulin resistance. Monozygotic twin pairs were excluded from the study. Charts were analyzed for evidence of additional autoimmune disorders. The institutional review board approved the study protocol.

Sibling pairs were classified according to age at type 1 diabetes diagnosis. Group 1 was composed of pairs in which both proband and sibling were diagnosed at <10 years of age. Group 2 was composed of all other pairs (i.e., at least one

sibling diagnosed at 10–18 years). Screening for thyroid dysfunction was performed by obtaining thyroxine (T4 and T3RU) and/or serum thyrotropin (TSH).

At least one screening was performed every 2 years in 90% of the patients. Screening for celiac disease was obtained on any patient with symptoms suggestive of celiac disease (10). The presence of AIT was determined by the following criteria: TSH level outside the assay reference range (0.35–5.5  $\mu$ U/ml) and positive thyroid antibodies, normal TSH and positive thyroid antibodies, or abnormal TSH alone. Thyroid antibody studies were obtained in patients with an enlarged thyroid gland, abnormal TSH, or first-degree relative with AIT.

Analyses were conducted with SAS version 8.2 (SAS Institute, Cary, NC). Group comparisons were performed using unpaired *t* tests,  $\chi^2$  analysis, and Fisher's exact test.

**RESULTS** — Of the 138 patients (69 sibling pairs, age  $14.4 \pm 5.4$  years), 49% were male. At least one comorbid autoimmune disorder was found in 27 patients (20%). There were 38 sibling pairs in group 1 and 31 pairs in group 2. Mean age at type 1 diabetes diagnosis was  $3.8 \pm 2.4$  years for probands and  $5.3 \pm 3.0$  years for siblings in group 1 and  $8.0 \pm 4.5$  years for probands and  $13.1 \pm 3.0$  years for sib-

lings in group 2. Duration of type 1 diabetes was similar between groups (group 1,  $7.5 \pm 4.8$  years; group 2,  $6.9 \pm 4.7$  years).

At least one additional autoimmune disorder was identified in 19 of 76 patients in group 1 (25%) and 8 of 62 patients in group 2 (13%). Among the 27 patients, there were 33 autoimmune conditions: 25 AIT (19 in group 1), 5 celiac disease (3 in group 1), 1 juvenile rheumatoid arthritis (group 1), 1 premature ovarian failure (group 2), and 1 vitiligo (group 2). Occurrence of AIT was significantly higher in group 1 (25%) than group 2 (10%) ( $P = 0.02$ ). Of the 25 patients with AIT, 12 had elevated TSH and positive thyroid antibodies, 10 had normal TSH and positive thyroid antibodies, and 3 had elevated TSH alone (antibody results unavailable).

In group 1, 58% of patients with AIT were female; 100% of patients with AIT in group 2 were female (NS). In families where one or both siblings had AIT, a family history of AIT was present in 4 of 12 families in group 1 and 1 of 5 families in group 2 (NS). Overall, thyroid hormone replacement was required in 14% of patients in group 1 compared to 6% in group 2 (NS).

To further explore the relationship between age at onset of type 1 diabetes and occurrence of AIT, we examined patients with AIT independent of group assignment. Patients with AIT were significantly younger at type 1 diabetes diagnosis ( $4.7 \pm 4.0$  years) than patients without AIT ( $7.8 \pm 4.8$  years) ( $P = 0.003$ ). Attained age did not differ between those with and without AIT ( $13.9 \pm 5.4$  vs.  $14.5 \pm 5.4$  years). Duration of type 1 diabetes was  $9.2 \pm 4.2$  years in patients with AIT compared with  $6.8 \pm 4.8$  years in patients without AIT ( $P = 0.02$ ). The majority of patients with AIT were diagnosed with type 1 diabetes when very young. Of the 33 patients diagnosed at <3 years of age, 36% had AIT, compared with 14% of those diagnosed at  $\geq 3$  years of age ( $P = 0.005$ ). Prevalence of AIT declined with increasing age at on-

From the <sup>1</sup>Division of Endocrinology, Children's Hospital Boston, Boston, Massachusetts; and the <sup>2</sup>Pediatric Adolescent, and Young Adult Section, Joslin Diabetes Center, Boston, Massachusetts.

Address correspondence and reprint requests to Lori M.B. Laffel, MD, MPH, Pediatric, Adolescent, and Young Adult Section, Joslin Diabetes Center, One Joslin Place, Boston, MA 02215. E-mail: lori.laffel@joslin.harvard.edu.

Received for publication 13 January 2006 and accepted in revised form 22 February 2006.

**Abbreviations:** AIT, autoimmune thyroiditis; TSH, thyrotropin.

A table elsewhere in this issue shows conventional and Système International (SI) units and conversion factors for many substances.

DOI: 10.2337/dc06-0098

© 2006 by the American Diabetes Association.

The costs of publication of this article were defrayed in part by the payment of page charges. This article must therefore be hereby marked "advertisement" in accordance with 18 U.S.C. Section 1734 solely to indicate this fact.

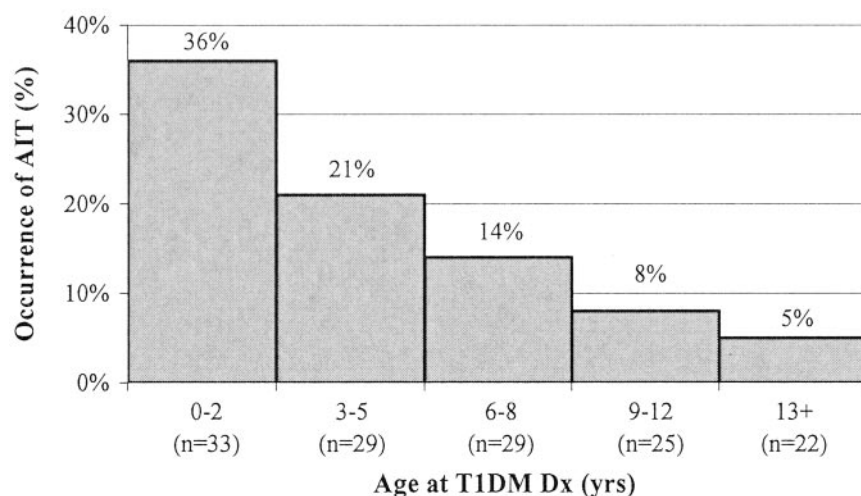

**Figure 1**—Occurrence of AIT by age at type 1 diabetes (T1DM) diagnosis (Dx). Younger age at onset of type 1 diabetes was significantly associated with increased occurrence of AIT in our sample of youth with type 1 diabetes ( $\chi^2 = 12.4$ ,  $df = 4$ ,  $P = 0.01$ ).

set of type 1 diabetes ( $P = 0.01$ ) (Fig. 1). Notably, within each age strata, patients with and without AIT had similar duration of diabetes.

**CONCLUSIONS**— Sibling pairs concordant for type 1 diabetes commonly develop other autoimmune disorders. Overall, 1 in 5 patients (20%) from multiplex families with sibling pairs concordant for type 1 diabetes had an additional autoimmune disorder, and most of these patients (25 of 27) had AIT. Occurrence of AIT was associated with age at onset of type 1 diabetes. One-fourth of sibling pairs in which both siblings were diagnosed with type 1 diabetes at <10 years had AIT, as compared with 10% of other sibling pairs. Five of six patients with multiple additional autoimmune disorders were diagnosed with type 1 diabetes at <10 years. Remarkably, one-third of patients who were diagnosed with type 1 diabetes at <3 years of age had AIT.

A limitation of our study was the absence of uniform thyroid-screening parameters, possibly leading to an underestimation of the prevalence of AIT in our population. Those patients with longer duration of diabetes were likely screened for AIT more frequently than those with shorter duration. However, our sample's prevalence of AIT (18%) is

consistent with other studies in pediatric type 1 diabetes (1,8). Because our sample was selected to include multiplex families with type 1 diabetes who were likely to be enriched for autoimmunity, our findings may not be directly applicable to simplex families.

In summary, the high occurrence of AIT underscores the importance of ongoing surveillance in this population, particularly for those with a younger age at onset of type 1 diabetes.

**Acknowledgments**— G.G. was supported by a training grant in pediatric endocrinology (K12 DK63696-01) from the National Institutes of Health. Additional support was provided by the Charles H. Hood Foundation and the Catherine Adler Astrove Youth Education Fund.

We thank Richard DiVincenzo for invaluable assistance in searching the medical record database.

Portions of this manuscript were presented at the 86th Annual Meeting of the Endocrine Society (2004) and the 65th Annual Scientific Sessions of the American Diabetes Association (2005).

## References

1. Kordonouri O, Hartmann R, Deiss D, Wilms M, Gruters-Kieslich A: Natural course of autoimmune thyroiditis in type

1 diabetes: association with gender, age, diabetes duration, and puberty. *Arch Dis Child* 90:411–414, 2005

2. Barker JM, Eisenbarth GS: Autoimmune polyendocrine syndromes. In *Type 1 Diabetes: Molecular, Cellular, and Clinical Immunology* [book online], 2003. Denver, CO, Barbara Davis Center for Childhood Diabetes. Available from <http://www.barbaradaviscenter.org>. Accessed 29 April 2005
3. Lorini R, d'Annunzio G, Vitali L, Scaramuzza A: IDDM and autoimmune thyroid disease in the pediatric age group. *J Pediatr Endocrinol Metab* 9 (Suppl. 1): 89–94, 1996
4. Silverstein J, Klingensmith G, Copeland K, Plotnick L, Kaufman F, Laffel L, Deeb L, Grey M, Anderson B, Holzmeister LA, Clark N: Care of children and adolescents with type 1 diabetes: a statement of the American Diabetes Association. *Diabetes Care* 28:186–212, 2005
5. Roldan MB, Alonso M, Barrio R: Thyroid autoimmunity in children and adolescents with type 1 diabetes mellitus. *Diabetes Nutr Metab* 12:27–31, 1999
6. McKenna MJ, Herskowitz R, Wolfsdorf JI: Screening for thyroid disease in children with IDDM. *Diabetes Care* 13:801–803, 1990
7. Burek CL, Rose NR, Guire KE, Hoffman WH: Thyroid autoantibodies in black and in white children and adolescents with type 1 diabetes mellitus and their first degree relatives. *Autoimmunity* 7:157–167, 1990
8. Bilimoria KY, Pescovitz OH, DiMeglio LA: Autoimmune thyroid dysfunction in children with type 1 diabetes mellitus: screening guidelines based on a retrospective analysis. *J Pediatr Endocrinol Metab* 16:1111–1117, 2003
9. Jaeger C, Hatziaelaki E, Petzoldt R, Bretzel RG: Comparative analysis of organ-specific autoantibodies and celiac disease-associated antibodies in type 1 diabetic patients, their first-degree relatives, and healthy control subjects. *Diabetes Care* 24:27–32, 2001
10. Collin P, Kaukinen K, Valimaki M, Salmi J: Endocrinological disorders and celiac disease. *Endocr Rev* 23:464–483, 2002
11. Cerutti F, Bruno G, Chiarelli F, Lorini R, Meschi F, Sacchetti C: Younger age at onset and sex predict celiac disease in children and adolescents with type 1 diabetes: an Italian multicenter study. *Diabetes Care* 27:1294–1298, 2004
